# Supplementary material for: PBA-derived high-efficiency iron-based catalysts for CO2 hydrogenation
Source: Royal Society of Chemistry journal article supplement (doi:10.1039/d2cy00629d), 2022-01-01
Supplement: d2cy00629d1.pdf [file d2cy00629d1.pdf]

**Table S1.** Catalytic performance of CO<sub>2</sub> hydrogenation over different catalysts

| Catalysts                                                   | GHSV<br>(mLh <sup>-1</sup> g <sub>cat</sub> <sup>-1</sup> ) | T(°C) | P(Mpa) | CO <sub>2</sub> Conv<br>(%) | CO sel<br>(%) | Hydrocarbon selectivity (%) |                  |                 |
|-------------------------------------------------------------|-------------------------------------------------------------|-------|--------|-----------------------------|---------------|-----------------------------|------------------|-----------------|
|                                                             |                                                             |       |        |                             |               | CH <sub>4</sub>             | C <sub>2-4</sub> | C <sub>5+</sub> |
| Na-Fe <sub>3</sub> O <sub>4</sub> /<br>HZSM-5 <sup>1</sup>  | 4000                                                        | 320   | 3.0    | 34.0                        | 14.0          | 8.0                         | 18.0             | 74.0            |
| In <sub>2</sub> O <sub>3</sub> /<br>HZSM-5 <sup>2</sup>     | 9000                                                        | 340   | 3.0    | 19.0                        | 48.0          | 1.0                         | 27.6             | 71.4            |
| FeNa(1.18) <sup>3</sup>                                     | 2000                                                        | 320   | 3.0    | 40.5                        | 13.5          | 15.8                        | 54.1             | 30.1            |
| Fe-MOF-<br>derived <sup>4</sup>                             | 3600                                                        | 400   | 3.0    | 46.1                        | 17.5          | 32.3                        | 26.9             | 40.8            |
| 10K13Fe <sub>2</sub> Co<br>100ZrO <sub>2</sub> <sup>5</sup> | 7200                                                        | 400   | 3.0    | 42.3                        | 21.9          | 25.7                        | 34.0             | 18.4            |
| Na-Fe <sub>3</sub> O <sub>4</sub> <sup>6</sup>              | 4000                                                        | 320   | 3.0    | 34.0                        | 14.0          | 12.0                        | 48.0             | 40.0            |
| FeK/Al <sub>2</sub> O <sub>3</sub> <sup>7</sup>             | 1800                                                        | 400   | 3.0    | 53.5                        | 17.0          | 20.0                        | 37.0             | 26.0            |
| 5Mn-Na/Fe <sup>8</sup>                                      | 2040                                                        | 320   | 3.0    | 39.3                        | 9.0           | 8.9                         | 31.2             | 59.9            |
| K- ZnFe <sub>2</sub> O <sub>4</sub> <sup>9</sup>            | 12000                                                       | 320   | 2.0    | 47.1                        | 8.7           | 14.8                        | 39.1             | 46.1            |
| FeAlOx-5 <sup>10</sup>                                      | 4000                                                        | 330   | 3.5    | 36.8                        | 7.2           | 12.1                        | 30.1             | 57.8            |
| Our work                                                    | 12000                                                       | 320   | 3.0    | 57.75                       | 9.06          | 8.13                        | 18.13            | 73.8            |

**Table S2.** Catalyst components (Same K content in each catalyst)

| Catalyst | Distribution of element (%) |       |      |      |      |      |      |
|----------|-----------------------------|-------|------|------|------|------|------|
|          | K                           |       | Fe   | Co   | Ni   | Cu   | Zn   |
|          | a*                          | b*    |      |      |      |      |      |
| Fe-Fe    | 0.805                       | 0.805 | 63.5 |      |      |      |      |
| Co-Fe    | 0.696                       | 0.816 | 40.4 | 18.4 |      |      |      |
| Ni-Fe    | 0.342                       | 0.885 | 33.4 |      | 15.0 |      |      |
| Cu-Fe    | 0.0438                      | 0.812 | 35.2 |      |      | 16.3 |      |
| Zn-Fe    | 0.0242                      | 0.833 | 32.0 |      |      |      | 15.2 |

a: K content before K supplementation

b: K content after K supplementation

**Note: The data in this table were measured by ICP**

**Table S3** Comparison of performances of the catalyst (Reaction condition: T: 320 °C, P: 3 MPa, H<sub>2</sub>/CO<sub>2</sub>/N<sub>2</sub>: 18/6/6, GHSV: 12000 mL.g<sup>-1</sup> cat. h<sup>-1</sup>, TOS: 8 h, same K content).

| Catalyst | CO <sub>2</sub> conversion | S <sub>C</sub> <sub>0</sub> | FTY <sup>a</sup><br>(μmol <sub>CO<sub>2</sub></sub> ·g <sup>-1</sup> ·Fe·s <sup>-1</sup> ) | STY <sup>b</sup><br>(mmol·g <sup>-1</sup> ·Fe·h <sup>-1</sup> ) | Selectivity (C-%, CO-free) |       |        |                 | O/P <sup>c</sup> |
|----------|----------------------------|-----------------------------|--------------------------------------------------------------------------------------------|-----------------------------------------------------------------|----------------------------|-------|--------|-----------------|------------------|
|          |                            |                             |                                                                                            |                                                                 | CH <sub>4</sub>            | C=2-4 | CO 2-4 | C <sub>5+</sub> |                  |
| Fe-Fe    | 34.67                      | 26.53                       | 11.94                                                                                      | 20.29                                                           | 17.59                      | 41.09 | 6.66   | 34.68           | 6.17             |
| Co-Fe    | 46.03                      | 15.48                       | 28.66                                                                                      | 36.12                                                           | 23.54                      | 40.05 | 6.84   | 29.59           | 5.86             |
| Ni-Fe    | 36.63                      | 28.28                       | 23.41                                                                                      | 9.18                                                            | 65.36                      | 15.53 | 11.31  | 7.81            | 1.37             |
| Cu-Fe    | 32.93                      | 38.96                       | 17.10                                                                                      | 2.59                                                            | 25.77                      | 40.23 | 8.29   | 25.74           | 4.85             |
| Zn-Fe    | 50.67                      | 12.04                       | 41.45                                                                                      | 105.44                                                          | 11.64                      | 22.28 | 3.94   | 62.15           | 5.65             |

a: FTY: Iron time yield to hydrocarbons

b: STY: The space time yield (STY) from C<sub>5+</sub> hydrocarbons

c: Olefin to paraffin ratio of C<sub>2</sub>-C<sub>4</sub> hydrocarbons

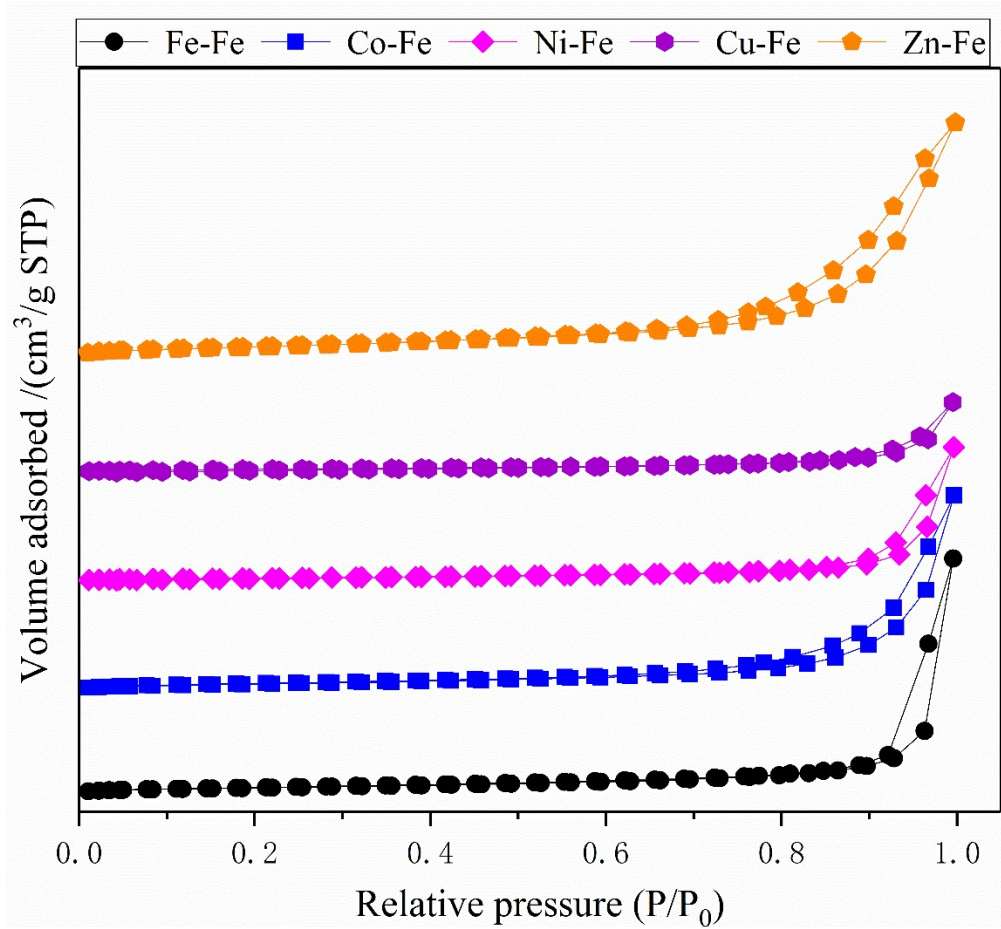

Fig S1. N<sub>2</sub> adsorption-desorption isotherms of different iron-based catalysts.

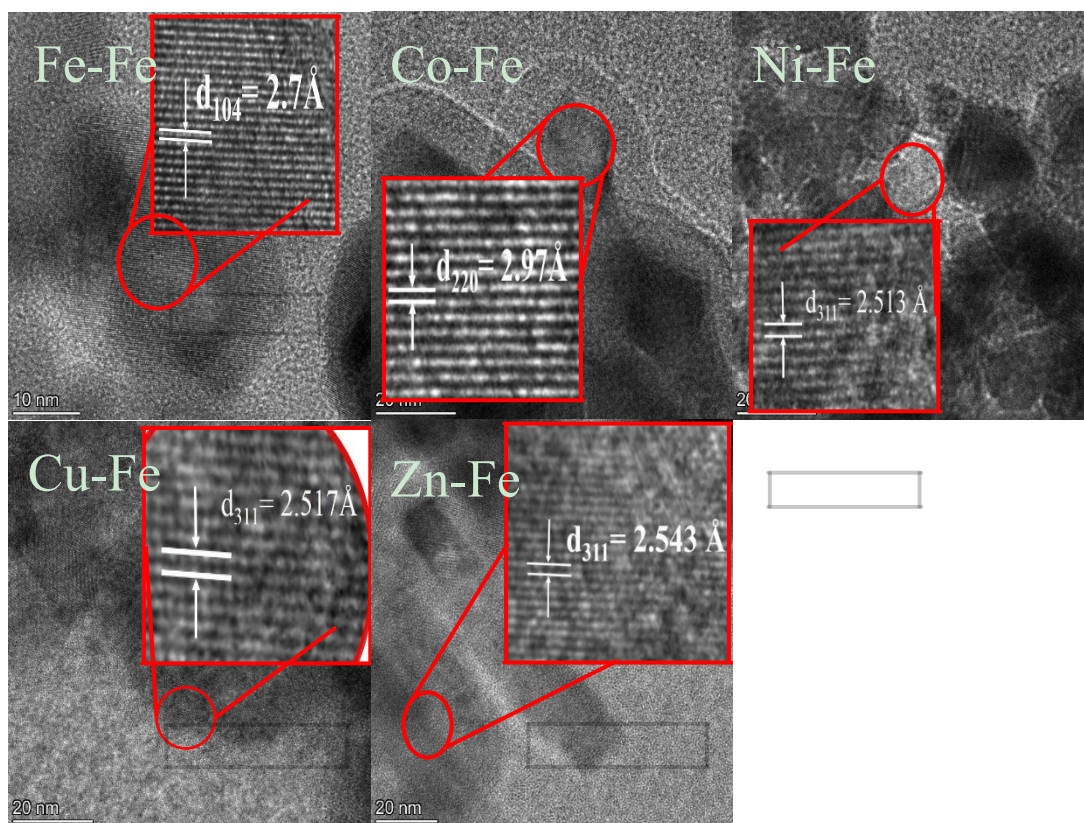

Fig S2 HR-TEM of fresh samples.

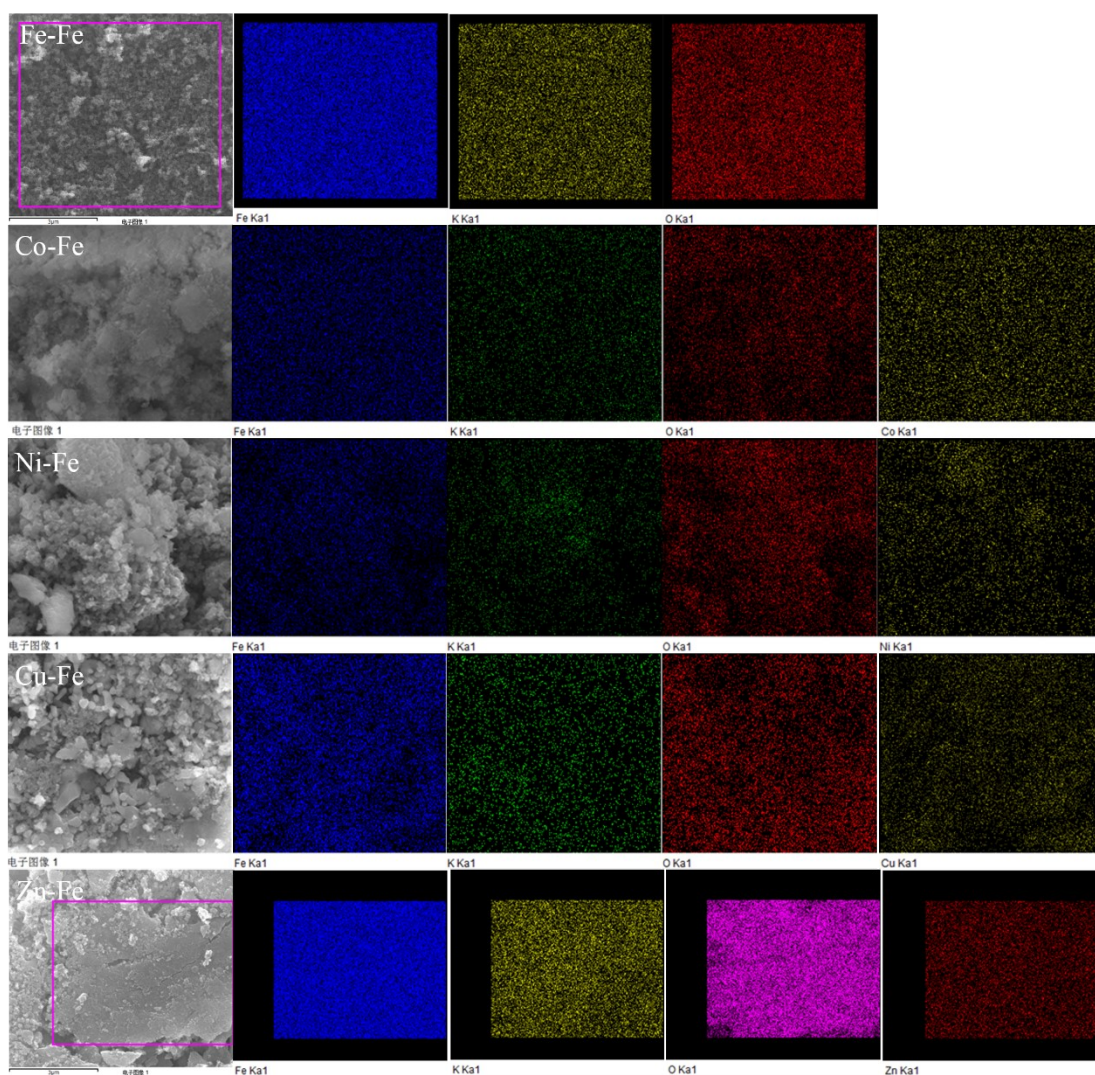

**Fig S3** Special SEM images and corresponding element composition mapping of different spinel-like catalysts.

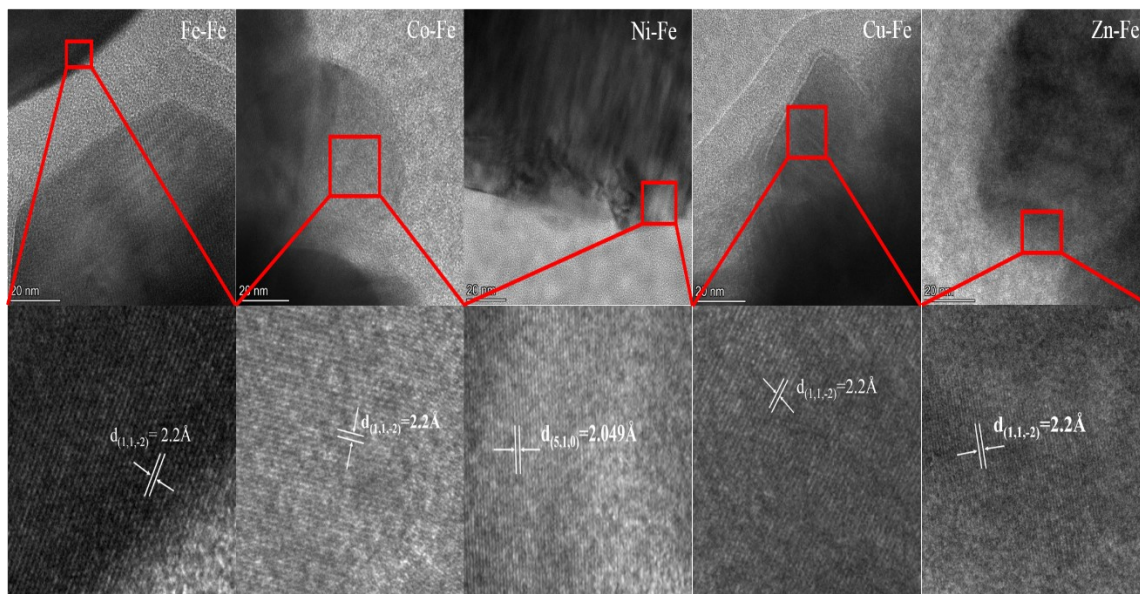

**Fig S4** HR-TEM of spent catalysts.

## Reference

- [1] Jian Wei<sup>1</sup>, Qingjie Ge, Ruwei Yao, Zhiyong Wen, Chuanyan Fang, Lisheng Guo, Hengyong Xu and Jian Sun. Directly converting CO<sub>2</sub> into a gasoline fuel. *Nat. Commun.*, 2017, 8, 15174-15181.
- [2] Peng Gao, Shenggang Li, Xianni Bu, Shanshan Dang, Ziyu Liu, Hui Wang, Liangshu Zhong, Minghuang Qiu, Chengguang Yang, Jun Cai, Wei Wei and Yuhan Sun. Direct conversion of CO<sub>2</sub> into liquid fuels with high selectivity over a bifunctional catalyst. *Nat. Chem.*, 2017, 9, 1019-1024.
- [3] Jian Wei, Jian Sun, Zhiyong Wen, Chuanyan Fang, Qingjie Ge and Hengyong Xu. New insights into the effect of sodium on Fe<sub>3</sub>O<sub>4</sub>-based nanocatalysts for CO<sub>2</sub> hydrogenation to light olefins. *Catal. Sci. Technol.*, 2016, 6, 4786-4793.
- [4] Junhui Liu, Anfeng Zhang, Min Liu, Shen Hu, Fanshu Ding, Chunshan Song, Xinwen Guo. Fe-MOF-derived highly active catalysts for carbon dioxide hydrogenation to valuable hydrocarbons. *Journal of CO<sub>2</sub> Utilization*, 2017, 21, 100–107.
- [5] Li, W.; Zhang, A.; Jiang, X.; Janik, M. J.; Qiu, J.; Liu, Z.; Guo, X.; Song, C. The anti-sintering catalysts: Fe–Co–Zr polymetallic fibers for CO<sub>2</sub> hydrogenation to C<sub>2</sub>–C<sub>4</sub>–rich hydrocarbons. *J. CO<sub>2</sub> Util.* 2018, 23, 219-225.
- [6] Shi, Z.; Yang, H.; Gao, P.; Li, X.; Zhong, L.; Wang, H.; Liu, H.; Wei, W.; Sun, Y. Direct conversion of CO<sub>2</sub> to long-chain hydrocarbon fuels over K-promoted CoCu/TiO<sub>2</sub> catalysts. *Catal. Today* 2018, 311, 65-73.
- [7] Ding, F.; Zhang, A.; Liu, M.; Zuo, Y.; Li, K.; Guo, X.; Song, C. CO<sub>2</sub> hydrogenation to hydrocarbons over iron-based catalyst: effects of physicochemical properties of Al<sub>2</sub>O<sub>3</sub> supports. *Ind. Eng. Chem. Res.*, 2014, 53, 17563-17569.
- [8] Binglian Liang, Ting Sun, Junguo Ma, Hongmin Duan, Lin Li, Xiaoli Yang, Yaru Zhang, Xiong Su, Yanqiang Huang and Tao Zhang. Mn decorated Na/Fe catalysts for CO<sub>2</sub> hydrogenation to light olefins. *Catal. Sci. Technol.*, 2019, 9, 456–464.
- [9] Lisheng Guo, Jie Li, Yu Cui, Rungtiwa Kosol, Yan Zeng, Guangbo Liu, Jinhu Wu, Tiansheng Zhao, Guohui Yang, Lishu Shao, Peng Zhan, Jienan Chen and Noritatsu Tsubaki. Spinel-structure catalyst catalyzing CO<sub>2</sub> hydrogenation to full spectrum alkenes with an ultra-high yield. *Chem. Commun.*, 2020, 56, 9372-9375.
- [10] Muhammad Kashif Khan, Paresh Butolia, Heuntae Jo, Muhammad Irshad, Daseul Han, Kyung-Wan Nam, and Jaehoon Kim. Selective Conversion of Carbon Dioxide into Liquid Hydrocarbons and Long-Chain  $\alpha$ -Olefins over Fe-Amorphous AlO<sub>x</sub> Bifunctional Catalysts. *ACS Catal.*, 2020, 10, 10325–10338.
